# Supplementary material
Source: PubMed Central journal article supplement (PMC9904188)
Supplement: NIHMS1867066-supplement-Supplemental_Table_1.pdf [file NIHMS1867066-supplement-Supplemental_Table_1.pdf]

## Supplemental Tables

**Supplemental Table 1. Comparison of Rates of cpRNFLT Thinning between DH and Non-DH Eyes in Glaucoma Suspects and Early Stage of POAG**

|                                                                   | DH Group<br>Mean (95% CI) | Non-DH Group<br>Mean (95% CI) | Difference<br>Mean (95% CI) | P value<br>(adjusted)          |
|-------------------------------------------------------------------|---------------------------|-------------------------------|-----------------------------|--------------------------------|
| <b>cpRNFLT Change Rate (<math>\mu\text{m}/\text{year}</math>)</b> |                           |                               |                             |                                |
| Mean Global                                                       | -0.50 (-0.78, -0.21)      | -0.48 (-0.63, -0.34)          | -0.01 (-0.33, 0.30)         | 0.935<br>(0.904)               |
| Nasal                                                             | -0.10 (-0.48, 0.27)       | -0.40 (-0.59, -0.21)          | 0.29 (-0.12, 0.71)          | 0.165<br>(0.283)               |
| Temporal                                                          | -0.29 (-0.84, 0.26)       | -0.12 (-0.40, 0.16)           | -0.16 (-0.78, 0.45)         | 0.601<br>(0.565)               |
| Inferonasal                                                       | -0.67 (-1.23, -0.11)      | -0.98 (-1.27, -0.70)          | 0.31 (-0.32, 0.94)          | 0.333<br>(0.243)               |
| Inferotemporal                                                    | -1.78 (-2.40, -1.16)      | -0.78 (-1.09, -0.47)          | -1.00 (-1.70, -0.31)        | <b>0.005</b><br><b>(0.013)</b> |
| Superonasal                                                       | -0.31 (-0.89, 0.26)       | -0.55 (-0.84, -0.26)          | 0.24 (-0.41, 0.88)          | 0.472<br>(0.726)               |
| Superotemporal                                                    | -0.28 (-0.85, 0.28)       | -0.58 (-0.86, -0.29)          | 0.29 (-0.35, 0.93)          | 0.370<br>(0.303)               |

cp = circumpapillary; DH = disc hemorrhage; RNFL = retinal nerve fiber layer. Values are shown in mean (95% confidence interval), unless otherwise indicated. Statistically significant P values are shown in bold.

\*Adjusted to age, gender, baseline 24-2 visual field mean deviation, and mean IOP.
