# Supplementary material
Source: PubMed Central journal article supplement (PMC9904188)
Supplement: NIHMS1867066-supplement-Supplemental_Table_2.pdf [file NIHMS1867066-supplement-Supplemental_Table_2.pdf]

**Supplemental Table 2. Comparison of Rates of CD Loss between DH and Non-DH Eyes in Glaucoma Suspects and Early Stage of POAG**

|                                | DH Group<br>Mean (95% CI) | Non-DH Group<br>Mean (95% CI) | Difference<br>Mean (95% CI) | P value<br>(adjusted)          |
|--------------------------------|---------------------------|-------------------------------|-----------------------------|--------------------------------|
| <b>CD Change Rate (%/year)</b> |                           |                               |                             |                                |
| wiCD                           | -0.91 (-1.19, -0.63)      | -0.58 (-0.73, -0.44)          | -0.32 (-0.64, -0.01)        | <b>0.042</b><br><b>(0.038)</b> |
| cpCD                           | -0.83 (-1.15, -0.51)      | -0.50 (-0.66, -0.34)          | -0.33 (-0.69, 0.02)         | 0.066<br>(0.078)               |
| Nasal                          | -1.06 (-1.47, -0.65)      | -0.58 (-0.78, -0.37)          | -0.48 (-0.94, -0.03)        | <b>0.038</b><br><b>(0.015)</b> |
| Temporal                       | -0.55 (-0.94, -0.16)      | -0.61 (-0.80, -0.41)          | 0.06 (-0.38, 0.50)          | 0.799<br>(0.709)               |
| Inferonasal                    | -0.86 (-1.36, -0.35)      | -0.26 (-0.51, 0.00)           | -0.60 (-1.17, -0.03)        | <b>0.038</b><br>(0.067)        |
| Inferotemporal                 | -1.36 (-1.90, -0.83)      | -0.43 (-0.70, -0.17)          | -0.93 (-1.53, -0.34)        | <b>0.002</b><br><b>(0.006)</b> |
| Superonasal                    | -0.56 (-1.06, -0.07)      | -0.33 (-0.57, -0.08)          | -0.24 (-0.79, 0.31)         | 0.401<br>(0.707)               |
| Superotemporal                 | -0.73 (-1.28, -0.18)      | -0.51 (-0.79, -0.23)          | -0.22 (-0.84, 0.40)         | 0.488<br>(0.525)               |

CD = capillary density; cp = circumpapillary; DH = disc hemorrhage; IOP = intraocular pressure; M = male; wi = whole image. Values are shown in mean (95% confidence interval), unless otherwise indicated. Statistically significant P values are shown in bold.

\*Adjusted to age, gender, baseline 24-2 visual field mean deviation, and mean IOP.
