# Supplementary material
Source: PubMed Central journal article supplement (PMC9904188)
Supplement: NIHMS1867066-supplement-Supplemental_Table_3.pdf [file NIHMS1867066-supplement-Supplemental_Table_3.pdf]

**Supplemental Table 3. Factors Contributing to the Rate of Inferotemporal cpRNFL Thinning Over Time in Study Participants by Univariable Mixed Model Analysis**

| Variables                           | Univariable Model           |              | Multivariable Model 1       |              | Multivariable Model 2       |              |
|-------------------------------------|-----------------------------|--------------|-----------------------------|--------------|-----------------------------|--------------|
|                                     | $\beta$ , 95 % CI           | P value      | $\beta$ , 95 % CI           | P value      |                             |              |
| Age, per 10 years older             | 0.07 (-0.16, 0.30)          | 0.562        | 0.16 (-0.07, 0.38)          | 0.180        | 0.14 (-0.09, 0.38)          | 0.230        |
| Gender: Female                      | <b>-0.69 (-1.19, -0.19)</b> | <b>0.007</b> | -0.45 (-0.96, 0.07)         | 0.090        | -0.47 (-0.99, 0.05)         | 0.077        |
| Race:                               |                             |              |                             |              |                             |              |
| African American                    | -0.30 (-0.89, 0.29)         | 0.318        |                             |              |                             |              |
| Self-reported diabetes              | 0.01 (-0.73, 0.75)          | 0.985        |                             |              |                             |              |
| Self-reported hypertension          | 0.07 (-0.46, 0.59)          | 0.806        |                             |              |                             |              |
| MOPP, per 1 mmHg lower              | 0.00 (-0.03, 0.03)          | 0.910        |                             |              |                             |              |
| Axial length, per 1mm longer        | <b>0.23 (-0.01, 0.48)</b>   | <b>0.060</b> | 0.21 (-0.03, 0.45)          | 0.092        | 0.19 (-0.06, 0.44)          | 0.132        |
| CCT, per 100 $\mu$ m thinner        | -0.37 (0.28, -1.02)         | 0.266        |                             |              |                             |              |
| Baseline IOP, per 1 mmHg higher     | <b>-0.06 (-0.11, 0.00)</b>  | <b>0.057</b> |                             |              |                             |              |
| Mean IOP, per 1 mmHg higher         | -0.06 (-0.13, 0.02)         | 0.147        | -0.06 (-0.14, 0.01)         | 0.103        | -0.07 (-0.14, 0.01)         | 0.083        |
| History of disc hemorrhage          | <b>-1.01 (-1.62, -0.40)</b> | <b>0.001</b> | <b>-1.05 (-1.68, -0.41)</b> | <b>0.001</b> | <b>-1.03 (-1.67, -0.39)</b> | <b>0.002</b> |
| History of inferior disc hemorrhage | <b>-1.13 (-1.82, -0.44)</b> | <b>0.001</b> |                             |              |                             |              |
| Baseline 24-2 VF MD, per 1 dB worse | 0.04 (-0.02, 0.11)          | 0.205        | 0.04 (-0.03, 0.10)          | 0.290        |                             |              |
| Baseline wiCD, per 1 % lower        | 0.04 (-0.01, 0.09)          | 0.150        |                             |              | 0.01 (-0.05, 0.06)          | 0.942        |
| Follow-up period, per 1 year longer | -0.17 (-0.50, 0.16)         | 0.316        |                             |              |                             |              |
| SDOCT number of scans               | 0.06 (-0.09, 0.21)          | 0.439        |                             |              |                             |              |
| Average SQ, per 1 higher            | -0.11 (-0.34, 0.12)         | 0.360        |                             |              |                             |              |

CCT = central corneal thickness; CD = capillary density; cp = circumpapillary; IOP = intraocular pressure; MD = mean deviation; MOPP = mean ocular perfusion pressure; RNFL = retinal nerve fiber layer; SDOCT = spectral domain optical coherence tomography; SQ = scan quality; SSI = signal strength index; VF = visual field; wi = whole image. Values are shown in  $\beta$  coefficient (95% confidence interval). Statistically significant P values are shown in bold.
